# Supplementary material
Source: MDPI journal article supplement (https://www.mdpi.com/search?q=molbank-2023-M1558)
Supplement: s002 [file molbank-2023-M1558-s002-mod.mol]

Untitled ACS Document 1996-2
  corina  01172313503D 1   1.00000     0.00000 
CORINA 4.4.0 0026  12.08.2021
 40 43  0  0  0  0  0  0  0  0999 V2000
   -4.2585    0.3707    6.2246 N   0  0  0  0  0  0  0  0  0  0  0  0
   -4.0591    0.4006    7.6757 C   0  0  0  0  0  0  0  0  0  0  0  0
   -5.3580    0.0770    8.3680 C   0  0  0  0  0  0  0  0  0  0  0  0
   -3.2570    0.7341    5.3992 C   0  0  0  0  0  0  0  0  0  0  0  0
   -3.4863    0.7960    3.9468 C   0  0  0  0  0  0  0  0  0  0  0  0
   -2.4573    1.1021    3.1068 C   0  0  0  0  0  0  0  0  0  0  0  0
   -2.6423    1.0056    1.6549 C   0  0  0  0  0  0  0  0  0  0  0  0
   -1.9754    1.8934    0.8004 C   0  0  0  0  0  0  0  0  0  0  0  0
   -2.1529    1.7980   -0.5611 C   0  0  0  0  0  0  0  0  0  0  0  0
   -2.9920    0.8231   -1.0890 C   0  0  0  0  0  0  0  0  0  0  0  0
   -3.1635    0.7340   -2.4327 O   0  0  0  0  0  0  0  0  0  0  0  0
   -3.6564   -0.0606   -0.2460 C   0  0  0  0  0  0  0  0  0  0  0  0
   -3.4822    0.0215    1.1169 C   0  0  0  0  0  0  0  0  0  0  0  0
   -2.1635    1.0110    5.8546 O   0  0  0  0  0  0  0  0  0  0  0  0
   -4.7495   -1.7908    4.1672 N   0  0  0  0  0  0  0  0  0  0  0  0
   -5.3208   -3.1369    4.2541 C   0  0  0  0  0  0  0  0  0  0  0  0
   -4.4052   -4.0201    5.0620 C   0  0  0  0  0  0  0  0  0  0  0  0
   -5.4419   -0.8022    3.5674 C   0  0  0  0  0  0  0  0  0  0  0  0
   -4.8317    0.5264    3.3992 C   0  0  0  0  0  0  0  0  0  0  0  0
   -5.5078    1.5082    2.7382 C   0  0  0  0  0  0  0  0  0  0  0  0
   -4.9750    2.8745    2.7102 C   0  0  0  0  0  0  0  0  0  0  0  0
   -5.1764    3.6850    1.5851 C   0  0  0  0  0  0  0  0  0  0  0  0
   -4.6745    4.9664    1.5647 C   0  0  0  0  0  0  0  0  0  0  0  0
   -3.9689    5.4570    2.6576 C   0  0  0  0  0  0  0  0  0  0  0  0
   -3.7664    4.6576    3.7770 C   0  0  0  0  0  0  0  0  0  0  0  0
   -4.2678    3.3762    3.8108 C   0  0  0  0  0  0  0  0  0  0  0  0
   -6.5713   -1.0082    3.1650 O   0  0  0  0  0  0  0  0  0  0  0  0
   -5.7065   -1.2399    8.6029 C   0  0  0  0  0  0  0  0  0  0  0  0
   -6.8978   -1.5368    9.2383 C   0  0  0  0  0  0  0  0  0  0  0  0
   -7.7404   -0.5168    9.6388 C   0  0  0  0  0  0  0  0  0  0  0  0
   -7.3921    0.8001    9.4035 C   0  0  0  0  0  0  0  0  0  0  0  0
   -6.1982    1.0971    8.7732 C   0  0  0  0  0  0  0  0  0  0  0  0
   -4.5157   -4.0541    6.4395 C   0  0  0  0  0  0  0  0  0  0  0  0
   -3.6796   -4.8684    7.1801 C   0  0  0  0  0  0  0  0  0  0  0  0
   -2.7294   -5.6449    6.5437 C   0  0  0  0  0  0  0  0  0  0  0  0
   -2.6150   -5.6066    5.1666 C   0  0  0  0  0  0  0  0  0  0  0  0
   -3.4514   -4.7925    4.4259 C   0  0  0  0  0  0  0  0  0  0  0  0
   -3.4762    6.7217    2.6319 O   0  0  0  0  0  0  0  0  0  0  0  0
   -1.8179   -6.5327    7.3511 C   0  0  0  0  0  0  0  0  0  0  0  0
   -9.0390   -0.8405   10.3315 C   0  0  0  0  0  0  0  0  0  0  0  0
 35 39  1  0      
 30 40  1  0      
  1  2  1  0      
  2  3  1  0      
  4  5  1  0      
  5  6  2  0      
  6  7  1  0      
  7  8  1  0      
  8  9  2  0      
  9 10  1  0      
 10 11  1  0      
 10 12  2  0      
 12 13  1  0      
  7 13  2  0      
  4 14  2  0      
  1  4  1  0      
 15 16  1  0      
 16 17  1  0      
 18 19  1  0      
 19 20  2  0      
 20 21  1  0      
 21 22  1  0      
 22 23  2  0      
 23 24  1  0      
 24 25  2  0      
 25 26  1  0      
 21 26  2  0      
 18 27  2  0      
 15 18  1  0      
  5 19  1  0      
  3 28  2  0      
 28 29  1  0      
 29 30  2  0      
 30 31  1  0      
 31 32  2  0      
 32  3  1  0      
 17 33  2  0      
 33 34  1  0      
 34 35  2  0      
 35 36  1  0      
 36 37  2  0      
 37 17  1  0      
 24 38  1  0      
M  STY  1   1 SUP
M  SLB  1   1   1
M  SAL   1  1  39
M  SBL   1  1   1
M  SMT   1 ^Me
M  SBV   1   1    0.7145   -0.4125
M  STY  1   2 SUP
M  SLB  1   2   2
M  SAL   2  1  40
M  SBL   2  1   2
M  SMT   2 Me
M  SBV   2   2   -0.7145    0.4125
M  END
$$$$
