# Supplementary material
Source: MDPI journal article supplement (https://www.mdpi.com/search?q=molbank-2023-M1558)
Supplement: s002 [file molbank-2023-M1558-s002.inchi]

InChI=1S/C34H32N2O4/c1-23-3-7-27(8-4-23)21-35-33(39)31(19-25-11-15-29(37)16-12-25)32(20-26-13-17-30(38)18-14-26)34(40)36-22-28-9-5-24(2)6-10-28/h3-20,37-38H,21-22H2,1-2H3,(H,35,39)(H,36,40)/b31-19+,32-20+
AuxInfo=1/1/N:39,40,34,36,29,31,33,37,28,32,22,26,8,13,23,25,9,12,20,6,16,2,35,30,21,7,17,3,24,10,19,5,18,4,15,1,38,11,27,14/E:(1,2)(3,4,5,6)(7,8,9,10)(11,12,13,14)(15,16,17,18)(19,20)(21,22)(23,24)(25,26)(27,28)(29,30)(31,32)(33,34)(35,36)(37,38)(39,40)/gE:(1,2)/rA:40NCCCCCCCCCOCCONCCCCCCCCCCCOCCCCCCCCCCOCC/rB:s1;s2;s1;s4;d5;s6;s7;d8;s9;s10;d10;d7s12;d4;;s15;s16;s15;s5s18;d19;s20;s21;d22;s23;d24;d21s25;d18;d3;s28;d29;s30;s3d31;d17;s33;d34;s35;s17d36;s24;s35;s30;/rC:3.3338,-.385,0;4.6675,.385,0;6.0011,-.385,0;2.0004,.385,0;.6667,-.385,0;.6667,-2.5767,0;-.6667,-3.3466,0;-2.0004,-2.5767,0;-3.3338,-3.3466,0;-3.3338,-4.8865,0;-4.6675,-5.6565,0;-2.0004,-5.6565,0;-.6667,-4.8865,0;2.0004,1.9248,0;-3.3338,.385,0;-4.6675,-.385,0;-6.0011,.385,0;-2.0004,-.385,0;-.6667,.385,0;-.6667,2.5767,0;.6667,3.3466,0;2.0004,2.5767,0;3.3338,3.3466,0;3.3338,4.8865,0;2.0004,5.6564,0;.6667,4.8865,0;-2.0004,-1.9248,0;6.0011,-1.9293,0;7.3383,-2.7014,0;8.6757,-1.9293,0;8.6757,-.385,0;7.3383,.3871,0;-6.0011,1.9293,0;-7.3383,2.7014,0;-8.6757,1.9293,0;-8.6757,.385,0;-7.3383,-.3871,0;4.6675,5.6565,0;-10.0131,2.7014,0;10.0131,-2.7014,0;
