# Supplementary material
Source: MDPI journal article supplement (https://www.mdpi.com/search?q=molbank-2023-M1558)
Supplement: s002 [file molbank-2023-M1558-s002.mol]

Untitled ACS Document 1996-2
  ChemDraw12212213482D

 40 43  0  0  0  0  0  0  0  0999 V2000
    1.7811   -0.2057    0.0000 N   0  0  0  0  0  0  0  0  0  0  0  0
    2.4936    0.2057    0.0000 C   0  0  0  0  0  0  0  0  0  0  0  0
    3.2061   -0.2057    0.0000 C   0  0  0  0  0  0  0  0  0  0  0  0
    1.0687    0.2057    0.0000 C   0  0  0  0  0  0  0  0  0  0  0  0
    0.3562   -0.2057    0.0000 C   0  0  0  0  0  0  0  0  0  0  0  0
    0.3562   -1.3766    0.0000 C   0  0  0  0  0  0  0  0  0  0  0  0
   -0.3562   -1.7879    0.0000 C   0  0  0  0  0  0  0  0  0  0  0  0
   -1.0687   -1.3766    0.0000 C   0  0  0  0  0  0  0  0  0  0  0  0
   -1.7811   -1.7879    0.0000 C   0  0  0  0  0  0  0  0  0  0  0  0
   -1.7811   -2.6106    0.0000 C   0  0  0  0  0  0  0  0  0  0  0  0
   -2.4936   -3.0220    0.0000 O   0  0  0  0  0  0  0  0  0  0  0  0
   -1.0687   -3.0220    0.0000 C   0  0  0  0  0  0  0  0  0  0  0  0
   -0.3562   -2.6106    0.0000 C   0  0  0  0  0  0  0  0  0  0  0  0
    1.0687    1.0283    0.0000 O   0  0  0  0  0  0  0  0  0  0  0  0
   -1.7811    0.2057    0.0000 N   0  0  0  0  0  0  0  0  0  0  0  0
   -2.4936   -0.2057    0.0000 C   0  0  0  0  0  0  0  0  0  0  0  0
   -3.2061    0.2057    0.0000 C   0  0  0  0  0  0  0  0  0  0  0  0
   -1.0687   -0.2057    0.0000 C   0  0  0  0  0  0  0  0  0  0  0  0
   -0.3562    0.2057    0.0000 C   0  0  0  0  0  0  0  0  0  0  0  0
   -0.3562    1.3766    0.0000 C   0  0  0  0  0  0  0  0  0  0  0  0
    0.3562    1.7879    0.0000 C   0  0  0  0  0  0  0  0  0  0  0  0
    1.0687    1.3766    0.0000 C   0  0  0  0  0  0  0  0  0  0  0  0
    1.7811    1.7879    0.0000 C   0  0  0  0  0  0  0  0  0  0  0  0
    1.7811    2.6106    0.0000 C   0  0  0  0  0  0  0  0  0  0  0  0
    1.0687    3.0219    0.0000 C   0  0  0  0  0  0  0  0  0  0  0  0
    0.3562    2.6106    0.0000 C   0  0  0  0  0  0  0  0  0  0  0  0
   -1.0687   -1.0283    0.0000 O   0  0  0  0  0  0  0  0  0  0  0  0
    3.2061   -1.0307    0.0000 C   0  0  0  0  0  0  0  0  0  0  0  0
    3.9205   -1.4432    0.0000 C   0  0  0  0  0  0  0  0  0  0  0  0
    4.6350   -1.0307    0.0000 C   0  0  0  0  0  0  0  0  0  0  0  0
    4.6350   -0.2057    0.0000 C   0  0  0  0  0  0  0  0  0  0  0  0
    3.9205    0.2068    0.0000 C   0  0  0  0  0  0  0  0  0  0  0  0
   -3.2061    1.0307    0.0000 C   0  0  0  0  0  0  0  0  0  0  0  0
   -3.9205    1.4432    0.0000 C   0  0  0  0  0  0  0  0  0  0  0  0
   -4.6350    1.0307    0.0000 C   0  0  0  0  0  0  0  0  0  0  0  0
   -4.6350    0.2057    0.0000 C   0  0  0  0  0  0  0  0  0  0  0  0
   -3.9205   -0.2068    0.0000 C   0  0  0  0  0  0  0  0  0  0  0  0
    2.4936    3.0220    0.0000 O   0  0  0  0  0  0  0  0  0  0  0  0
   -5.3495    1.4432    0.0000 C   0  0  0  0  0  0  0  0  0  0  0  0
    5.3495   -1.4432    0.0000 C   0  0  0  0  0  0  0  0  0  0  0  0
 35 39  1  0      
 30 40  1  0      
  1  2  1  0      
  2  3  1  0      
  4  5  1  0      
  5  6  2  0      
  6  7  1  0      
  7  8  1  0      
  8  9  2  0      
  9 10  1  0      
 10 11  1  0      
 10 12  2  0      
 12 13  1  0      
  7 13  2  0      
  4 14  2  0      
  1  4  1  0      
 15 16  1  0      
 16 17  1  0      
 18 19  1  0      
 19 20  2  0      
 20 21  1  0      
 21 22  1  0      
 22 23  2  0      
 23 24  1  0      
 24 25  2  0      
 25 26  1  0      
 21 26  2  0      
 18 27  2  0      
 15 18  1  0      
  5 19  1  0      
  3 28  2  0      
 28 29  1  0      
 29 30  2  0      
 30 31  1  0      
 31 32  2  0      
 32  3  1  0      
 17 33  2  0      
 33 34  1  0      
 34 35  2  0      
 35 36  1  0      
 36 37  2  0      
 37 17  1  0      
 24 38  1  0      
M  STY  1   1 SUP
M  SLB  1   1   1
M  SAL   1  1  39
M  SBL   1  1   1
M  SMT   1 ^Me
M  SBV   1   1    0.7145   -0.4125
M  STY  1   2 SUP
M  SLB  1   2   2
M  SAL   2  1  40
M  SBL   2  1   2
M  SMT   2 Me
M  SBV   2   2   -0.7145    0.4125
M  END
